# Supplementary material for: Superior triacylglycerol (TAG) accumulation in starchless mutants of Scenedesmus obliquus: (I) mutant generation and characterization
Source: PubMed Central journal article supplement (PMC4052810; doi:10.1186/1754-6834-7-69), 2014-05-12
Supplement: 1754-6834-7-69-S1.pdf [file 1754-6834-7-69-S1.pdf]

### Supplementary data 1

**Table 1** Fatty acid composition expressed as % of total fatty acids (TFA) or fatty acids in TAG (TAG) 12 days after medium replacement. (A) Average fatty acid composition of TFA and TAG during nitrogen replete cultivation. (B) Fatty acid composition of TFA and TAG under nitrogen deplete conditions. Numbers given are averaged values (n=2) and the deviation from the duplicate average was less than 1% for all values except for the values that are indicated by an asterisk, where the deviation was between 1% and 5%.

| (A)   | wild type |      | slm1 |      | slm2 |      | slm3  |      | slm4  |       | slm6 |      |
|-------|-----------|------|------|------|------|------|-------|------|-------|-------|------|------|
|       | TFA       | TAG  | TFA  | TAG  | TFA  | TAG  | TFA   | TAG  | TFA   | TAG   | TFA  | TAG  |
| C16:0 | 16.2      | 11.2 | 16.0 | 11.2 | 16.2 | 12.5 | 16.3  | 13.1 | 16.6  | 15.4  | 14.9 | 10.6 |
| C16:1 | 2.6       | 1.7  | 2.6  | 0.1  | 2.3  | 1.9  | 2.6   | 0.6* | 2.5   | 2.0   | 2.3  | 1.8  |
| C16:2 | 2.4       | 1.1  | 3.0  | 1.3  | 1.9  | 0.9  | 2.6   | 1.2  | 2.5   | 0.5   | 2.3  | 1.1  |
| C16:3 | 3.4       | 1.4  | 4.4  | 1.7  | 5.5  | 1.5  | 3.6   | 1.2  | 4.1   | 1.4   | 3.6  | 0.7  |
| C16:4 | 11.1      | 3.6  | 10.5 | 3.5  | 7.8  | 2.7  | 11.5  | 3.7  | 10.9  | 2.7   | 10.7 | 3.9  |
| C18:0 | 0.6       | 2.2  | 0.5  | 2.2  | 0.7  | 1.3  | 0.6   | 3.0  | 0.8   | 2.2   | 0.6  | 1.5  |
| C18:1 | 14.8      | 43.6 | 12.3 | 43.1 | 24.5 | 54.2 | 12.2  | 42.1 | 14.3  | 46.6* | 17.1 | 47.0 |
| C18:2 | 19.9      | 11.5 | 23.1 | 13.2 | 13.0 | 6.0  | 21.1  | 11.5 | 18.2  | 8.1   | 17.6 | 10.5 |
| C18:3 | 18.7      | 10.2 | 18.7 | 11.1 | 10.3 | 11.6 | 18.9  | 11.6 | 19.8  | 11.1  | 19.6 | 11.1 |
| C18:4 | 5.1       | 6.6  | 4.7  | 5.9  | 5.6  | 5.8  | 5.2   | 5.8  | 5.5   | 5.4   | 5.9  | 6.8  |
| Other | 5.2       | 6.8  | 4.2  | 7.5  | 12.2 | 1.5  | 5.4   | 6.2  | 5.0   | 4.5   | 5.6  | 5.0  |
| (B)   |           |      |      |      |      |      |       |      |       |       |      |      |
| C16:0 | 16.5      | 16.2 | 16.4 | 16.2 | 18.0 | 18.0 | 17.8  | 17.7 | 17.9  | 17.8  | 15.8 | 15.4 |
| C16:1 | 3.8       | 4.0  | 4.4  | 4.6  | 4.1  | 4.3  | 3.9   | 4.1  | 3.6   | 3.8   | 3.7  | 3.9  |
| C16:2 | 2.8       | 2.6  | 2.9  | 2.7  | 2.4  | 2.3  | 2.6   | 2.5  | 2.0   | 2.0   | 2.8  | 2.7  |
| C16:3 | 2.4       | 2.0  | 2.7  | 2.3  | 2.5  | 2.2  | 2.5   | 2.2  | 2.7   | 2.3   | 2.7  | 2.3  |
| C16:4 | 2.0       | 1.6  | 1.5  | 1.2  | 1.7  | 1.5  | 1.8   | 1.5  | 1.9   | 1.5   | 2.4  | 1.9  |
| C18:0 | 3.6       | 3.9  | 3.8  | 4.1  | 4.1  | 4.3  | 4.1   | 4.3  | 3.9   | 4.1   | 3.1  | 3.3  |
| C18:1 | 47.9      | 51.2 | 49.5 | 52.4 | 47.9 | 50.4 | 47.4* | 50.1 | 48.1* | 50.9  | 47.7 | 50.6 |
| C18:2 | 8.2       | 7.7  | 7.0  | 6.5  | 7.0  | 6.6  | 7.6   | 7.1  | 6.6   | 6.3   | 7.9  | 7.6  |
| C18:3 | 10.3      | 8.7  | 9.6  | 8.3  | 10.1 | 8.7  | 10.0  | 8.7  | 10.8  | 9.4   | 11.7 | 9.9  |
| C18:4 | 1.2       | 1.1  | 1.0  | 0.9  | 1.1  | 1.0  | 1.1   | 1.0  | 1.3   | 1.2   | 1.4  | 1.2  |
| Other | 1.2       | 0.9  | 1.0  | 0.8  | 1.0  | 0.8  | 1.2   | 0.8  | 1.3   | 0.8   | 0.8  | 1.0  |
