# Supplementary material for: Superior triacylglycerol (TAG) accumulation in starchless mutants of Scenedesmus obliquus: (I) mutant generation and characterization
Source: PubMed Central journal article supplement (PMC4052810; doi:10.1186/1754-6834-7-69), 2014-05-12
Supplement: 1754-6834-7-69-S2.pdf [file 1754-6834-7-69-S2.pdf]

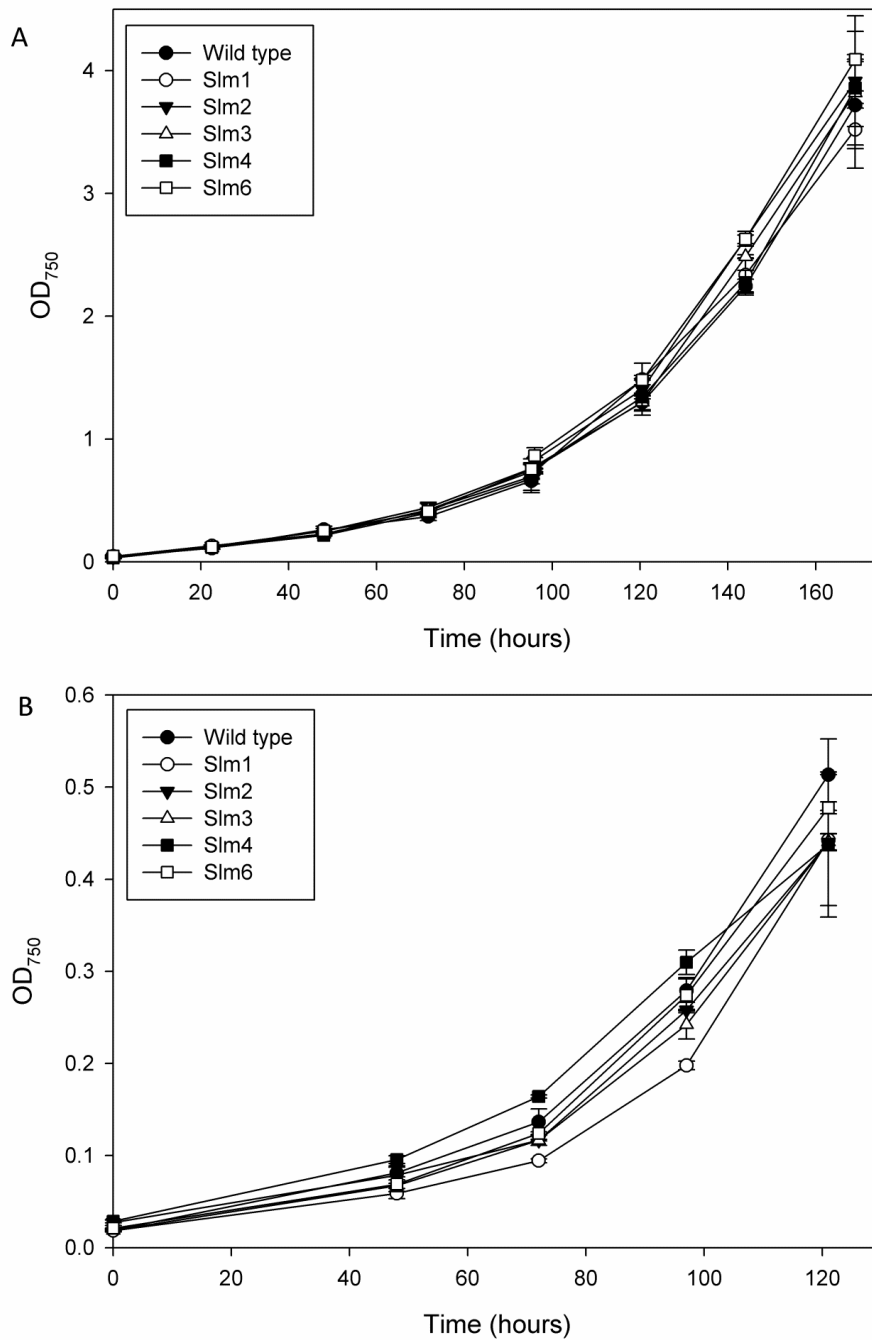

**Growth curve for starchless mutants and wild type under day night regime.** Two separate experiments were carried out to study the effect of day night cycles on all strains. 16:8 hour day night regime was applied. The growth was studied by measuring the OD<sub>750</sub> daily. (A) Cultivation in triplicate cultures for 7 days. (B) Cultivation in duplicate cultures for 5 days. Error bars indicate the distance to the mean. It can be seen that there are not many differences between the wild type and starchless mutants under these conditions.
